# Supplementary material for: Secondary interaction-manipulated metal–organic crystalline nanotube array for gas sensing
Source: Royal Society of Chemistry journal article supplement (doi:10.1039/d3ta01475d), 2023-01-01
Supplement: d3ta01475d1.pdf [file d3ta01475d1.pdf]

## Electronic Supplementary Information

### Secondary Interaction-Manipulated Metal–Organic Crystalline Nanotube Array for Gas Sensing

Jieying Hu,<sup>#a</sup> Jian-Ze Xiao,<sup>#b</sup> Wei-Ming Liao,<sup>\*a</sup> Shoujie Liu,<sup>c</sup> Jianming Li,<sup>a</sup> Yonghe He,<sup>a</sup> Lin Yu,<sup>a</sup> Qiaohong Li,<sup>b</sup> Gang Xu<sup>\*bde</sup> and Jun He<sup>\*a</sup>

<sup>a</sup> School of Chemical Engineering and Light Industry, Guangdong University of Technology, Guangzhou, 510006, P. R. China.

<sup>b</sup> State Key Laboratory of Structural Chemistry, Fujian Institute of Research on the Structure of Matter, Chinese Academy of Sciences, Fuzhou, 350002, P. R. China.

<sup>c</sup> Chemistry and Chemical Engineering of Guangdong Laboratory, Shantou, 515063, P. R. China.

<sup>d</sup> University of Chinese Academy of Sciences, Beijing, 100049, P. R. China.

<sup>e</sup> Fujian Science & Technology Innovation Laboratory for Optoelectronic Information of China, Fuzhou, 350108, P. R. China.

# These authors contributed equally to this work.

\* Corresponding author: junhe@gdut.edu.cn; gxu@fjirsm.ac.cn; wmliao@gdut.edu.cn.

## General procedure.

Starting materials, reagents, and solvents were purchased from commercial sources (*e.g.*, J&K, Aladdin, and Aldrich) and used without further purification. Solution  $^1\text{H}$  NMR spectra were recorded on a 400 MHz Bruker superconducting magnet high-field NMR spectrometer at room temperature with tetramethylsilane (TMS) as internal standard. Chemical shifts ( $\delta$ ) are expressed in ppm relative to the residual solvent (*e.g.* chloroform  $^1\text{H}$ : 7.26 ppm) reference. Coupling constants are expressed in hertz. FT-IR spectra were obtained using a Thermo-Fisher iS50R spectrophotometer. Thermogravimetric (TG) analyses were carried out using Netzsch STA449F5 thermal analyzer with a heating rate of 10  $^\circ\text{C}/\text{min}$  under  $\text{N}_2$  and 5  $^\circ\text{C}/\text{min}$  under air atmosphere, respectively. Elemental analysis (EA) was obtained with a Vario Micro CUBE CHN elemental analyzer. Powder X-ray diffraction (PXRD) patterns were collected on a Rigaku Smart lab diffractometer with Cu  $\text{K}\alpha$  radiation ( $\lambda = 1.5418 \text{ \AA}$ ) at room temperature. The X-ray tube operated at a voltage of 40 kV and a current of 15 mA. Temperature-dependent PXRD patterns was collected using microcrystalline samples on a Rigaku Ultima IV diffractometer (40 kV, 40 mA, Cu  $\text{K}\alpha 1$ ,  $\lambda = 1.5418 \text{ \AA}$ ). The measurement parameters include a scan speed of 5  $^\circ\text{C}/\text{min}$ , a step size of 0.01  $^\circ$ , and a scan range of  $2\theta$  from 5 to 30 $^\circ$ . The porosity and surface area analysis were performed using a Quantachrome Autosorb iQ gas sorption analyzer (version 5.21). The sample was outgassed at  $6.58 \times 10^{-5}$  torr with a 5  $^\circ\text{C}/\text{min}$  ramp to 105  $^\circ\text{C}$  and held at 105  $^\circ\text{C}$  for 8.2 hours. The sample was then held at vacuum until the analysis was run. The resistance data were measured on source meter equipment (Keithley 4200) with a single crystal solid, then electronic conductivity was determined by the function of  $\sigma = L/(R \cdot S)$ . X-ray photoelectron spectroscopic (XPS) measurements were conducted on a X-ray Photoelectron Spectroscopy System (Thermo Scientific K-Alpha). UV-Vis absorption Spectrum was collected in the UV-Visible Near Infra-red Spectrophotometer with Integrating Sphere (SHIMADZU, UV-3600 Plus). The morphology of the samples was investigated using scanning electron microscopy (SEM, TESCAN, CLARA, Czech). The high-resolution transmission electron microscope (HRTEM) images were collected on a transmission electron microscopy (JEOL JEM 2100F) with operating voltage at 200 kV. X-ray Absorption Fine Structure (XAFS) spectra were performed on the B14W1 beamline of the Shanghai Synchrotron Radiation Facility (SSRF), and the data reduction and analysis of XANES and FT-EXAFS spectra were completed by using Athena software through the technical support provided by Ceshigo Research Service: [www.ceshigo.com](http://www.ceshigo.com).

## Single crystal X-ray crystallography

Single crystal data for **Pb-HTT** were collected using a Rigaku Oxford SuperNova diffractometer using Ga K $\alpha$  radiation ( $\lambda = 1.34138 \text{ \AA}$ ) at 80 K. Reflections were indexed and reduced by using SAINT V8.38A, and the files were corrected for absorption using SADABS-2016/2. The space group was assigned, the structure was solved by direct methods using ShelXS<sup>1</sup> and refined by full matrix least squares against  $F^2$  with all reflections using ShelXL<sup>2</sup> of Olex2<sup>3</sup> software packages. All non-hydrogen atoms were refined with anisotropic thermal parameters, and all hydrogen atoms were included in calculated positions and refined with isotropic thermal parameters riding on those of the parent atoms. As the ethylenediamine was disordered, RIGU and SIMU were used to restrain the atomic displacement parameters (ADP), DFIX was used to restrain the bond lengths and bond angles. In addition, several bad reflections with large error/esd values were also omitted. Crystallized ethylenediamine, DMF, CH<sub>3</sub>OH and H<sub>2</sub>O molecules in the pores were disordered and difficult to solve, therefore the related electron density peaks have been removed by the SQUEEZE subroutine in PLATON.<sup>4</sup> The solvent mask was calculated and 1478 electrons were found in a volume of 5911  $\text{\AA}^3$  per unit cell. This is consistent with the presence of 3.5 C<sub>2</sub>N<sub>2</sub>H<sub>8</sub>, 0.4 C<sub>3</sub>H<sub>7</sub>NO, 1 CH<sub>3</sub>OH, 2 H<sub>2</sub>O per asymmetric unit, indicating a formula of [Pb<sub>5</sub>(HTT)<sub>2</sub>(C<sub>2</sub>N<sub>2</sub>H<sub>9</sub>)<sub>2</sub>] $\cdot$ 3.5C<sub>2</sub>N<sub>2</sub>H<sub>8</sub> $\cdot$ 0.4C<sub>3</sub>H<sub>7</sub>NO $\cdot$ CH<sub>3</sub>OH $\cdot$ 2H<sub>2</sub>O for **Pb-HTT**. Details of refinement results are listed in Table S1.

## DFT calculation

We have employed the Vienna Ab Initio Package (VASP)<sup>5,6</sup> to perform all the density functional theory (DFT) calculations within the generalized gradient approximation (GGA) using the Perdew-Burke-Ernzerhof (PBE)<sup>7</sup> formulation. We have chosen the projected augmented wave (PAW) potentials<sup>8,9</sup> to describe the ionic cores and take valence electrons into account using a plane wave basis set with a kinetic energy cutoff of 400 eV. Partial occupancies of the Kohn–Sham orbitals were allowed using the Gaussian smearing method and a width of 0.05 eV. The electronic energy was considered self-consistent when the energy change was smaller than  $10^{-5}$  eV. A geometry optimization was considered convergent when the force change was smaller than 0.02 eV/ $\text{\AA}$ . Grimme’s DFT-D3 methodology<sup>10</sup> was used to describe the dispersion interactions. The adsorption energies  $E_{ads}$  were calculated by the following formula:  $E_{ads} = E_{\text{gas on Pb-HTT}} - E_{\text{Pb-HTT}} - E_{\text{gas molecule}}$ , where  $E_{\text{gas on Pb-HTT}}$ ,  $E_{\text{Pb-HTT}}$  and  $E_{\text{gas molecule}}$  are the energy of gas molecule adsorbed on **Pb-HTT**, the energy of clean **Pb-HTT**, and the energy of isolated gas molecule in a cubic periodic box with a side length of 20  $\text{\AA}$  and a  $1 \times 1 \times 1$  Monkhorst-Pack  $k$ -point grid for Brillouin zone sampling, respectively.

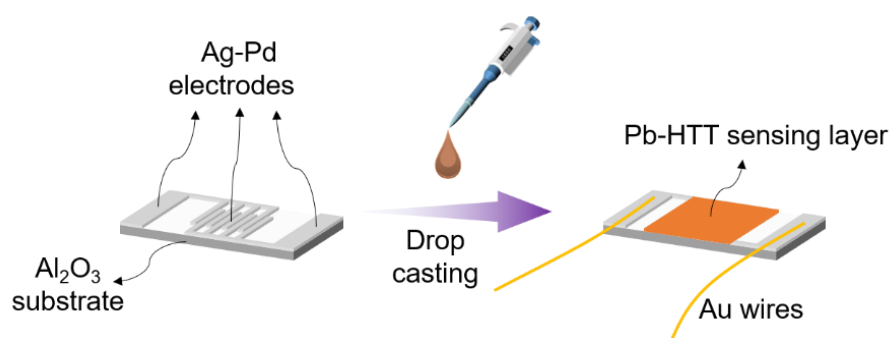

**Scheme S1.** Fabrication of gas sensor devices.

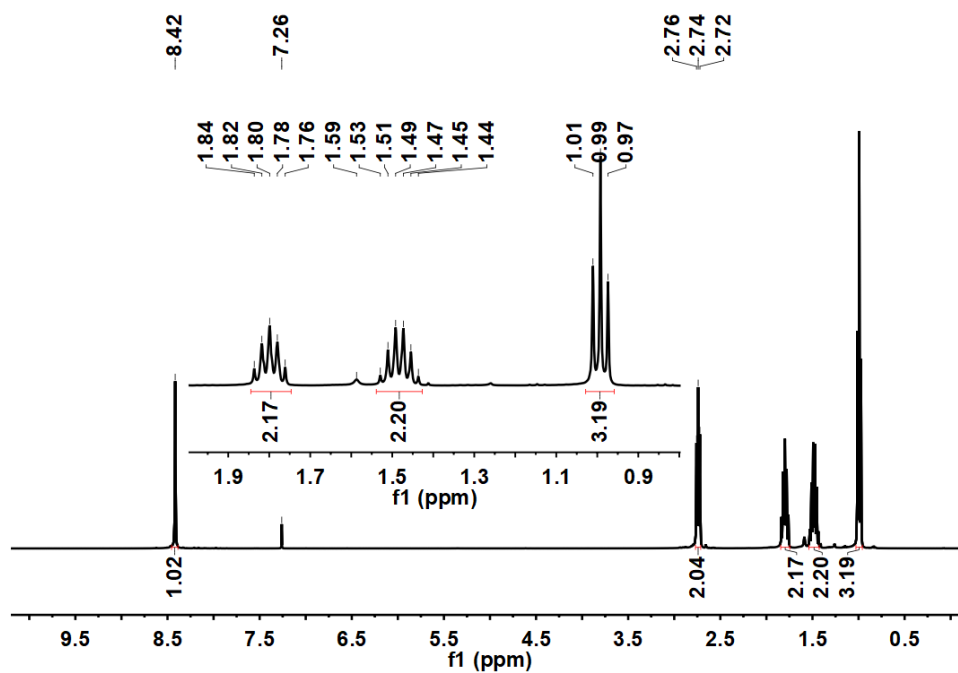

**Fig. S1.** Solution  $^1\text{H}$  NMR spectrum of HVaTT ( $\text{CDCl}_3$ , 400 MHz).

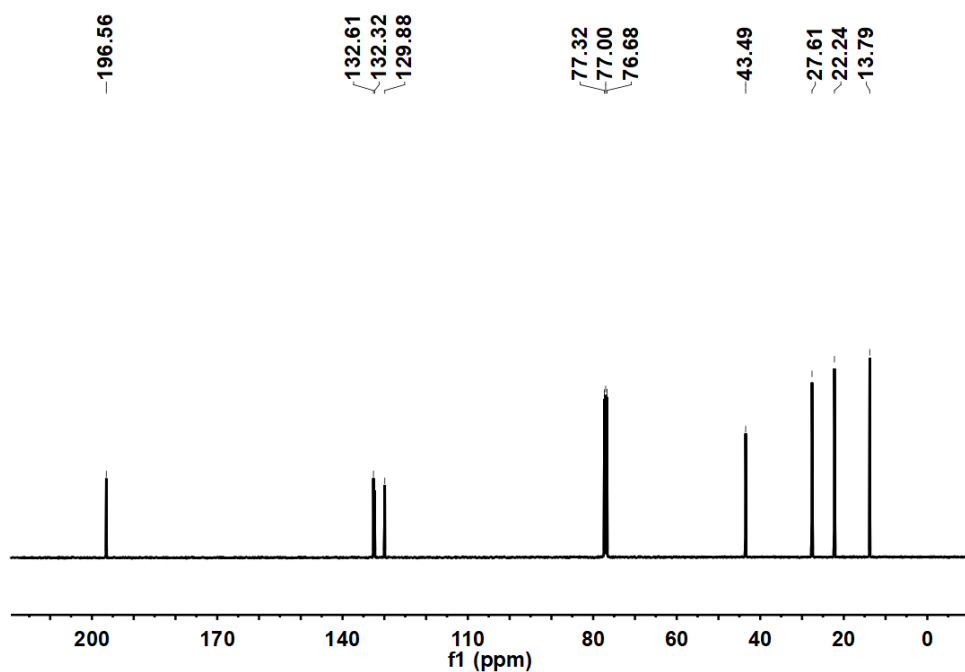

**Fig. S2.** Solution  $^{13}\text{C}$  NMR spectrum of HVaTT ( $\text{CDCl}_3$ , 101 MHz).

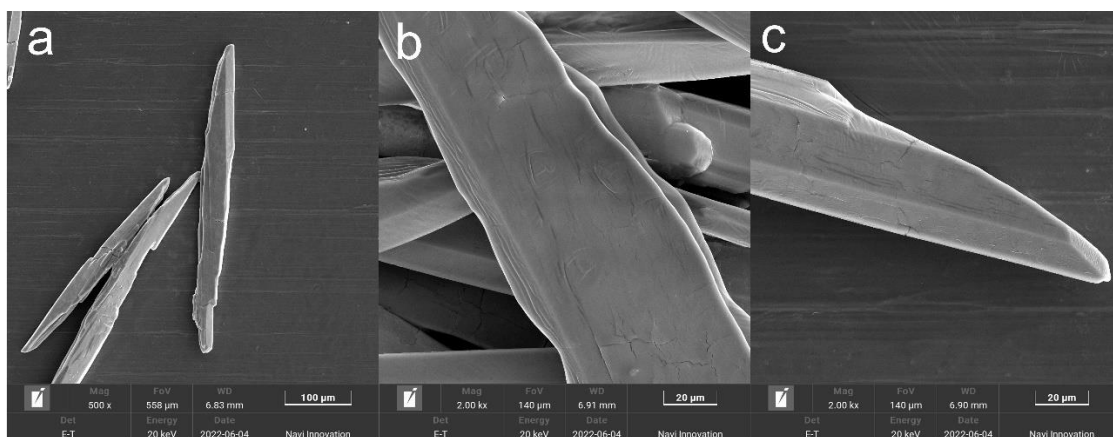

**Fig. S3.** SEM images of **Pb-HTT** crystals with the scale bar of (a) 100, and (b, c) 20  $\mu\text{m}$ , respectively.

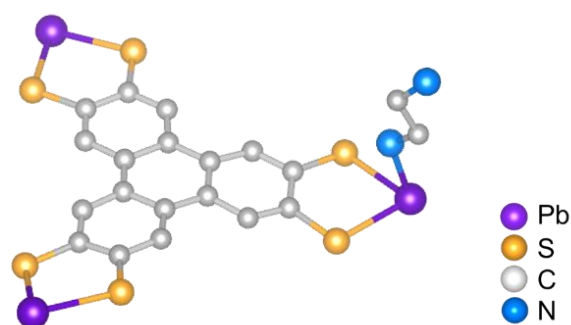

**Fig. S4.** The asymmetric unit of **Pb-HTT**. (Hydrogen atoms are omitted for clarity).

## Search Overview

**Search:** search1  
**Date/Time done:** Thu Sep 22 15:03:15 2022  
**Database(s):** CSD version 5.43 updates (Mar 2022)  
CSD version 5.43 (November 2021)  
CSD version 5.43 updates (Jun 2022)  
**Restriction Info:** No refcode restrictions applied  
**Filters:** None  
**Percentage Completed:** 100%  
**Number of Hits:** 84

Single query used. Search found structures that:

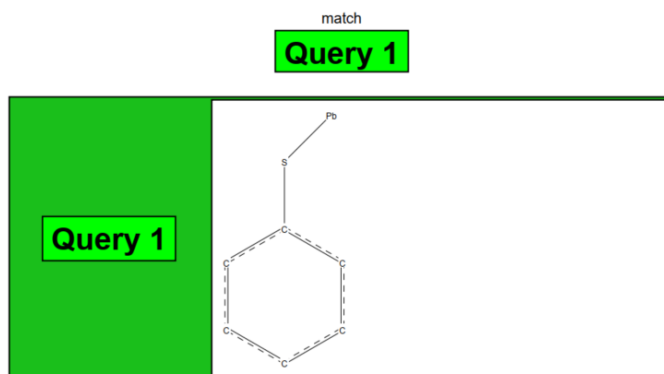

**Fig. S5.** Structure fragment and search conditions for the single crystals containing Pb-S bonds and/or secondary Pb $\cdots$ S interactions.

The above Pb $\cdots$ S-phenyl fragment in Figure S3 was taken as a query in CCDC database to search the coordination bond and secondary interaction between Pb and S, and the results of 70 hits were summarized in Table S3. It's found that all of the Pb-S bond lengths located below 3.20 Å, and most of the Pb $\cdots$ S secondary interaction distances located above 3.20 Å while several were between 2.95 and 3.20 Å. Based on the principles of rigor and adequacy, the Pb $\cdots$ S secondary interaction was tentatively attributed to the interaction with distance between 3.20 and 3.80 Å (Pb and S van der Waals radii).

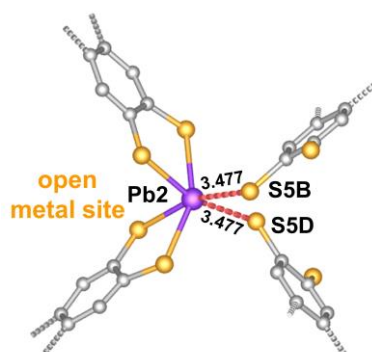

**Fig. S6.** The structure of Pb2 center. Coordination environment and secondary interactions of Pb2 center.

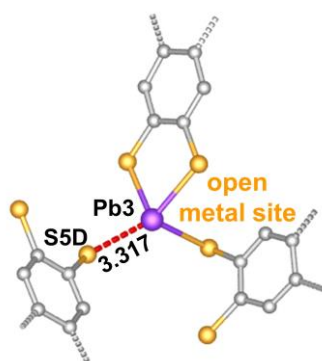

**Fig. S7.** The structure of Pb3 center. Coordination environment and secondary interactions of Pb3 center.

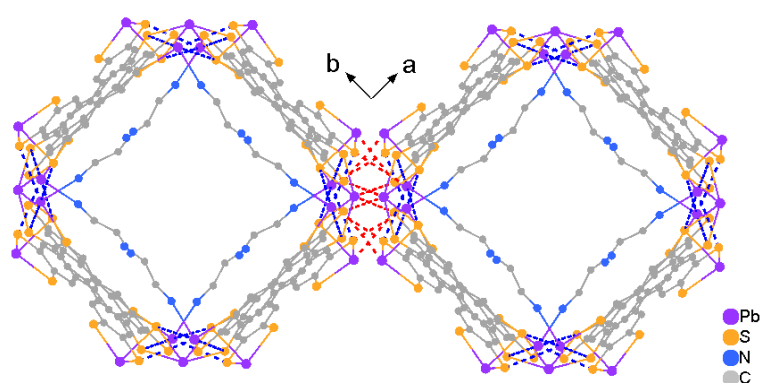

**Fig. S8.** The secondary Pb...S interactions in **Pb-HTT** array. Blue and red dots represent intra-tube and inter-tube secondary interactions, respectively.

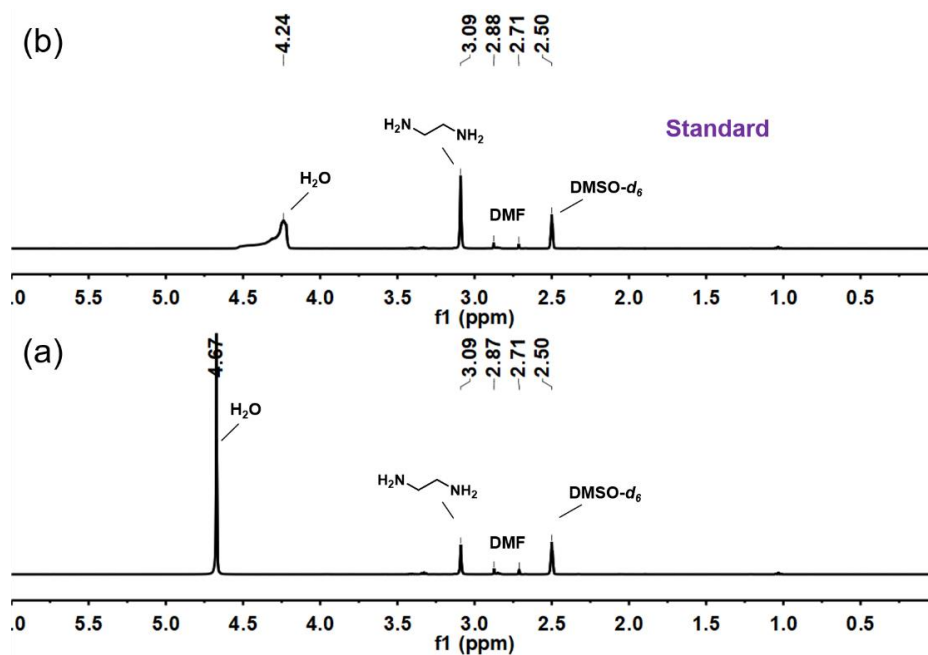

**Fig. S9.** Solution  $^1\text{H}$  NMR spectra (DMSO- $d_6$ , 400 MHz) for verifying the presence of ethylenediamine. (a) **Pb-HTT** dissolved in DMSO- $d_6$  (0.6 mL) and deuterated hydrochloric

acid (20  $\mu\text{L}$ ), (b) the spectrum of sample (a) being added the standard sample of ethylenediamine.

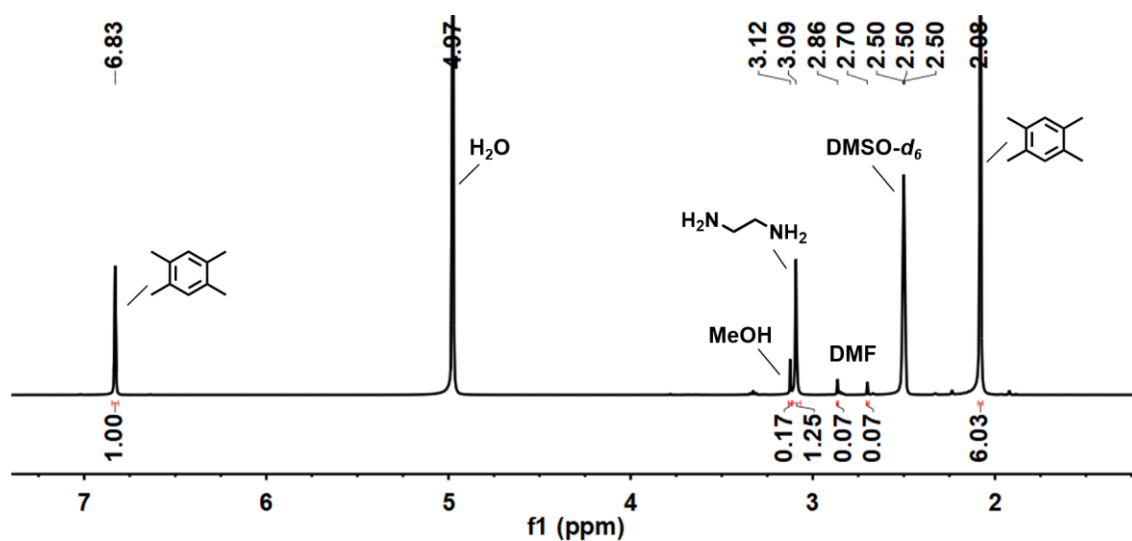

**Fig. S10.** Solution  $^1\text{H}$  NMR spectra (DMSO- $d_6$ , 400 MHz) for verifying the amount of ethylenediamine. **Pb-HTT** (7.60 mg) and internal standard 1,2,4,5-tetramethylbenzene (3.70 mg) were dissolved in DMSO- $d_6$  (0.6 mL) and deuterated hydrochloric acid (20  $\mu\text{L}$ ), indicating an amount of 13.62 wt%, 1.40 wt% and 1.24 wt% for ethylenediamine, methanol and DMF, respectively, which is quite close to the result of 13.74 wt%, 1.42 wt%, 1.25 wt% from the crystal data.

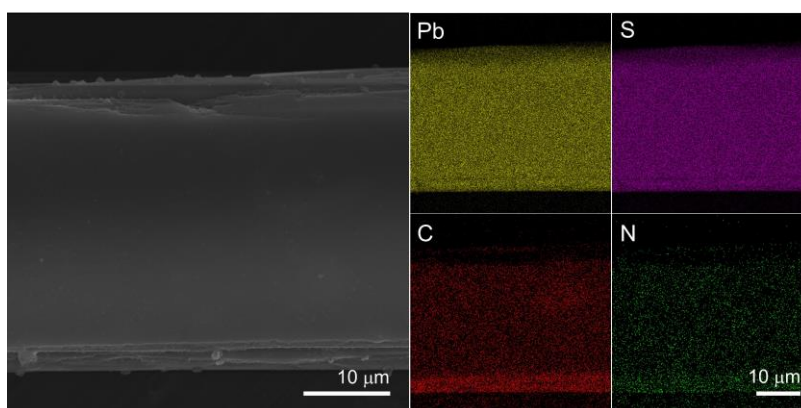

**Fig. S11.** Elemental mapping images of **Pb-HTT**.



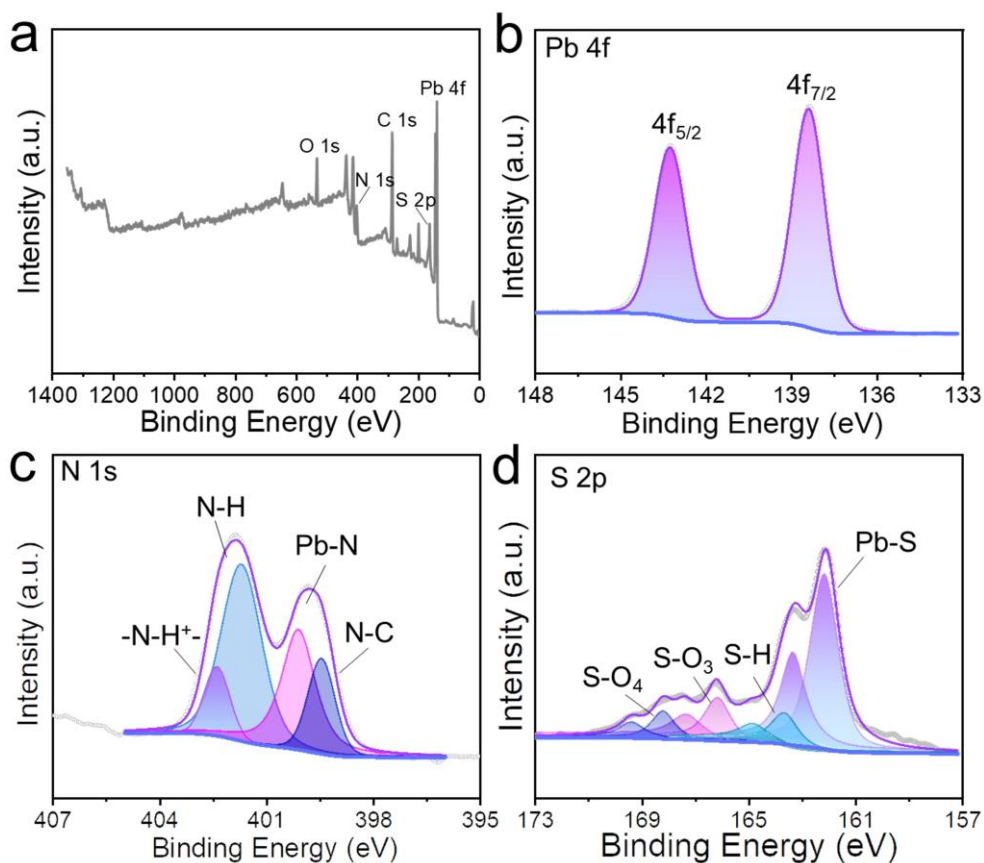

**Fig. S12.** XPS spectra of **Pb-HTT**. (a) Full region; (b) Pb 4f region; (c) N 1s region; (d) S 2p region. Deconvolution of the S 2p signal generates four sets of doublets. The doublets at 162.16 and 163.34 eV are derived from the Pb–S coordination. The weak doublets at 163.64 and 164.82 eV can be ascribed to the partially uncoordinated –SH residues. The peaks (from 166.15 to 169.38 eV) indicate the existence of –S–O– bond resulted from concomitant ligand oxidation

11-13.

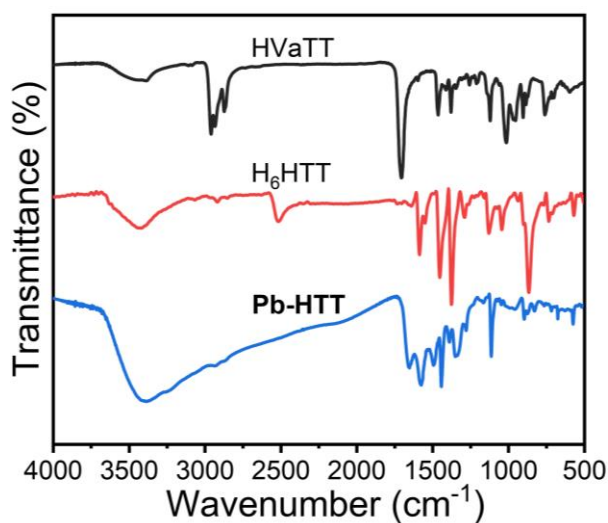

**Fig. S13.** FT-IR spectra of HVaTT, H<sub>6</sub>HTT and **Pb-HTT**. It features a strong absorption at 1700 cm<sup>-1</sup> for the carbonyl stretching of the thioester functional group. The stretching peaks at

2800-3000  $\text{cm}^{-1}$  are in accordance with aliphatic C-H groups. FT-IR spectrum of  $\text{H}_6\text{HTT}$  shows a S-H stretching peak at  $2507 \text{ cm}^{-1}$  which disappeared after coordination with  $\text{Pb}^{\text{II}}$ .

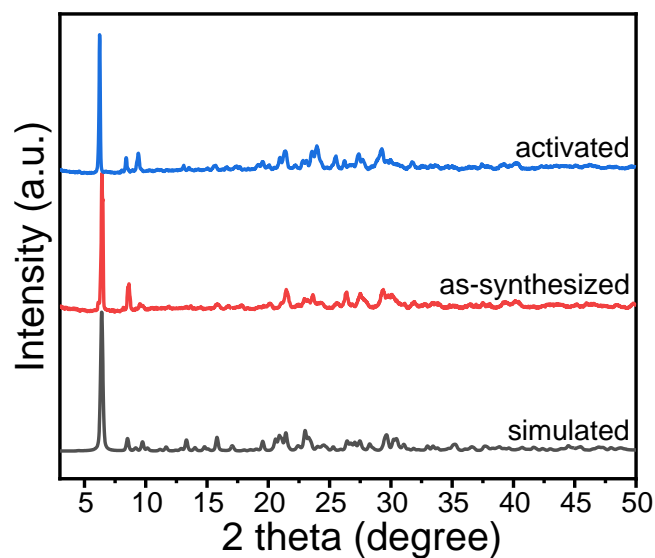

**Fig. S14.** PXRD patterns for **Pb-HTT**: (a) simulated, (b) as-synthesized and (c) after activation.

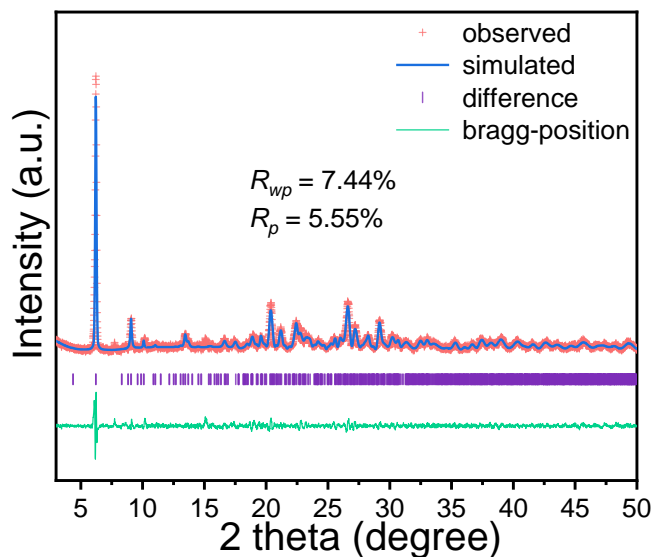

**Fig. S15.** Rietveld Refinement of the experimental PXRD pattern ( $\lambda = 1.5418 \text{ \AA}$ ) of **Pb-HTT**. The  $R_{wp}$  and  $R_p$  are equal to 7.44% and 5.55%, respectively.

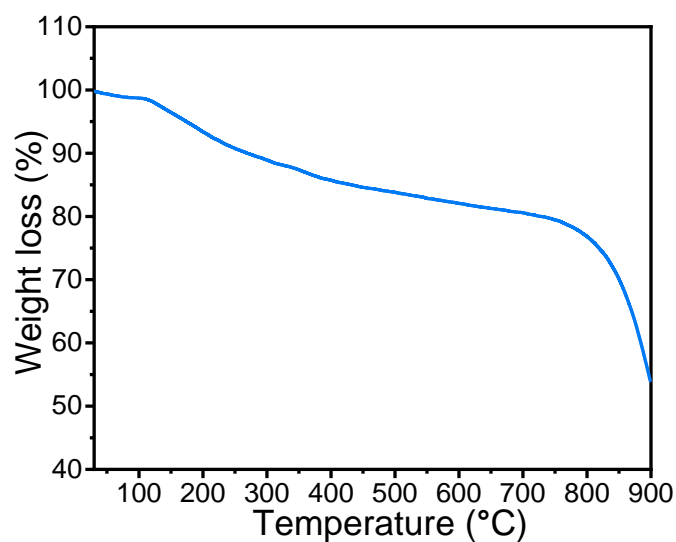

**Fig. S16.** TG curve of **Pb-HTT** recorded under  $N_2$  atmosphere (heating rate:  $5\text{ }^\circ\text{C}/\text{min}$ ).

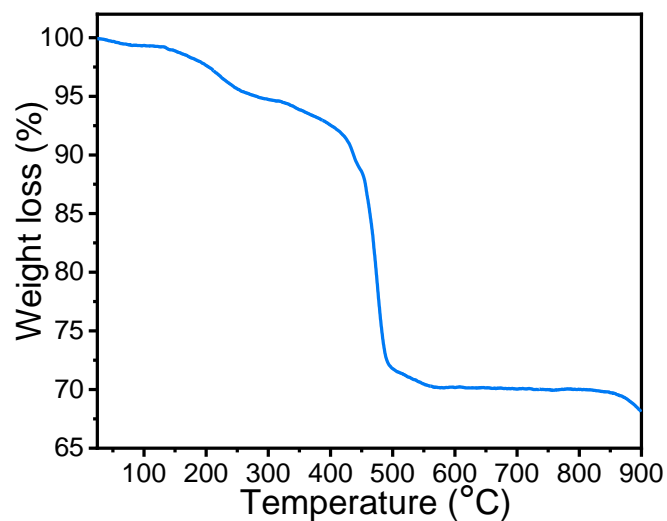

**Fig. S17.** TG curve of **Pb-HTT** recorded in air (heating rate:  $5\text{ }^\circ\text{C}/\text{min}$ ).

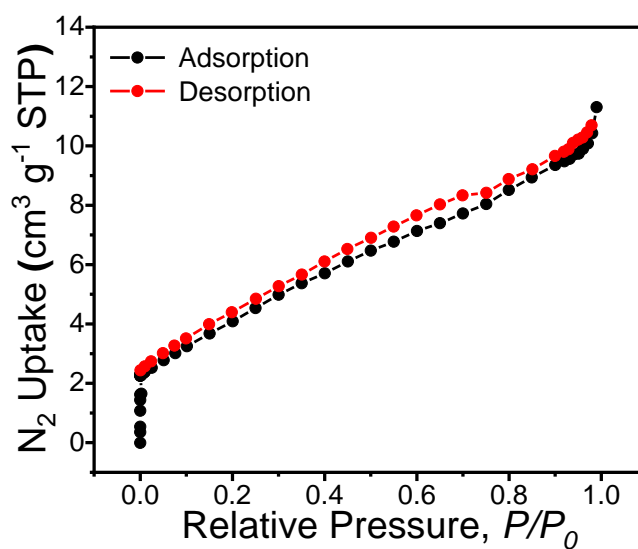

**Fig. S18.**  $N_2$  adsorption-desorption isotherms of **Pb-HTT** at  $77\text{ K}$ .

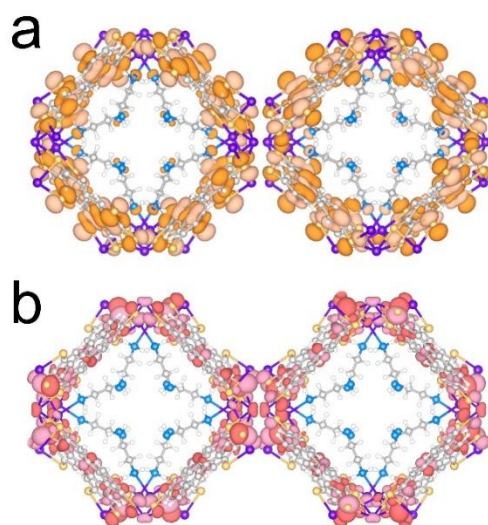

**Fig. S19.** Frontier electron density of (a) CBM and (b) VBM.

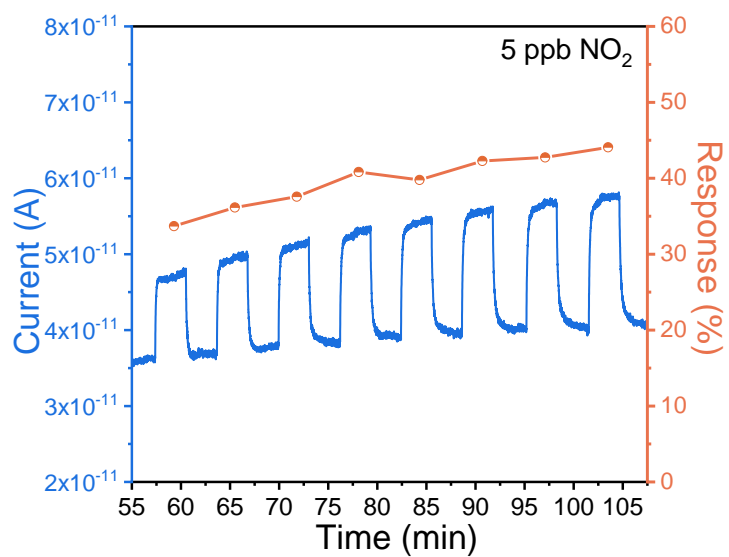

**Fig. S20.** NO<sub>2</sub> sensing of Pb-HTT. Current signal curves and response values towards 5 ppb NO<sub>2</sub> sensing.

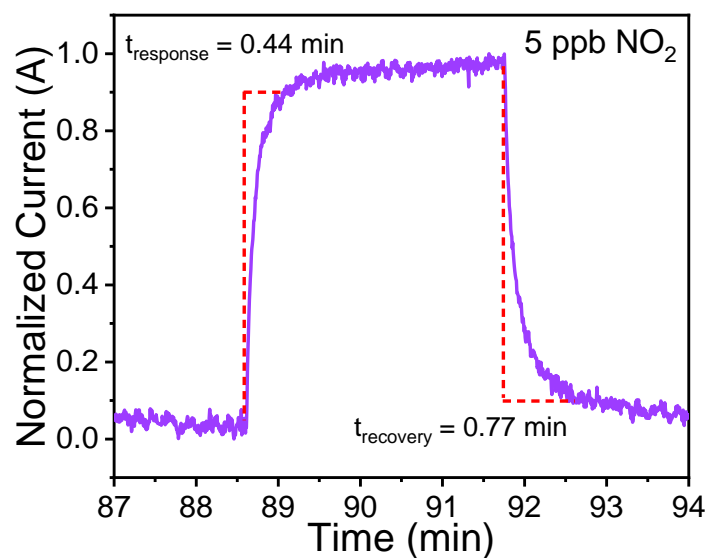

**Fig. S21.** Response and recovery time towards 10 ppm NO<sub>2</sub>.

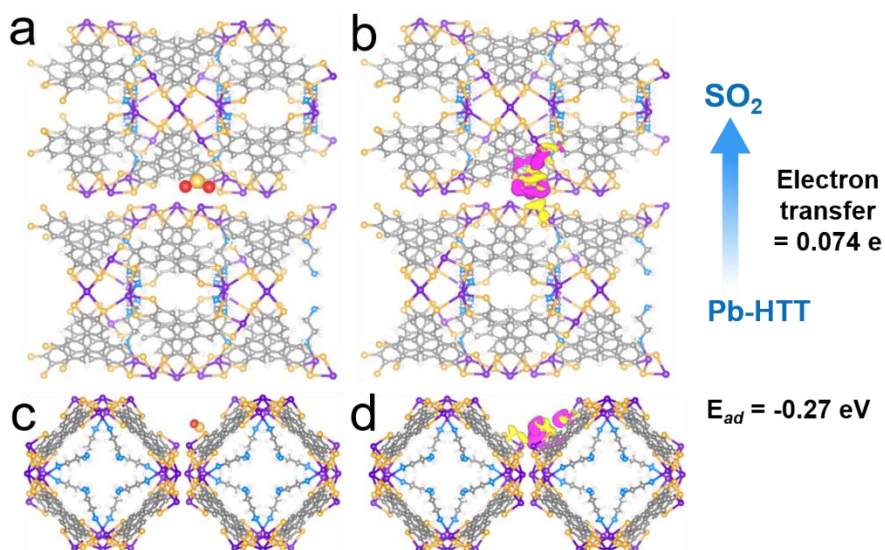

**Fig. S22.** DFT calculation of **Pb-HTT** towards SO<sub>2</sub>. Adsorption configuration of SO<sub>2</sub> on **Pb-HTT** viewed along (a) *b*-axis and (c) *c*-axis; Electron density difference of the corresponding model viewed along (b) *b*-axis and (d) *c*-axis. Pink indicates electron accumulation and yellow indicates electron depletion. The isovalue is set to be 0.0003 e Å<sup>-3</sup>.

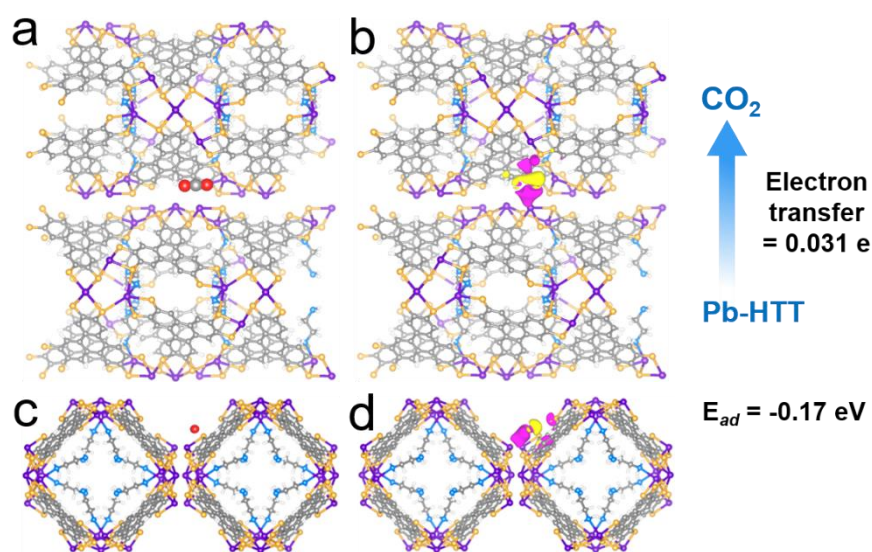

**Fig. S23.** DFT calculation of **Pb-HTT** towards  $\text{CO}_2$ . Adsorption configuration of  $\text{CO}_2$  on **Pb-HTT** viewed along (a) *b*-axis and (c) *c*-axis; Electron density difference of the corresponding model viewed along (b) *b*-axis and (d) *c*-axis. Pink indicates electron accumulation and yellow indicates electron depletion. The isovalue is set to be  $0.0003 \text{ e \AA}^{-3}$ .

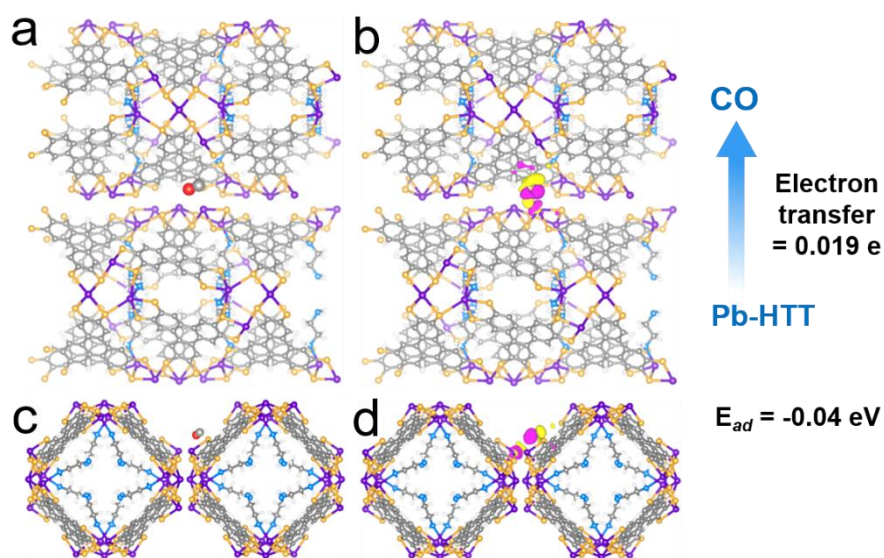

**Fig. S24.** DFT calculation of **Pb-HTT** towards  $\text{CO}$ . Adsorption configuration of  $\text{CO}$  on **Pb-HTT** viewed along (a) *b*-axis and (c) *c*-axis; Electron density difference of the corresponding model viewed along (b) *b*-axis and (d) *c*-axis. Pink indicates electron accumulation and yellow indicates electron depletion. The isovalue is set to be  $0.0003 \text{ e \AA}^{-3}$ .

**Table S1.** Crystallographic refinement parameters and results of **Pb-HTT**.

| Compound                            | <b>Pb-HTT</b>                                                                                                                                                                                                    |
|-------------------------------------|------------------------------------------------------------------------------------------------------------------------------------------------------------------------------------------------------------------|
| CCDC number                         | 2129174                                                                                                                                                                                                          |
| Empirical formula                   | $[\text{Pb}_5(\text{HTT})_2(\text{C}_2\text{N}_2\text{H}_9)_2] \cdot 3.5\text{C}_2\text{N}_2\text{H}_8 \cdot 0.4\text{C}_3\text{H}_7\text{N}$<br>$\text{O} \cdot \text{CH}_3\text{OH} \cdot 2\text{H}_2\text{O}$ |
| Formula weight                      | 2295.02                                                                                                                                                                                                          |
| Temperature/K                       | 80                                                                                                                                                                                                               |
| Crystal system                      | tetragonal                                                                                                                                                                                                       |
| Space group                         | $P4/ncc$ (130)                                                                                                                                                                                                   |
| $a/\text{\AA}$                      | 27.4995(14)                                                                                                                                                                                                      |
| $b/\text{\AA}$                      | 27.4995(14)                                                                                                                                                                                                      |
| $c/\text{\AA}$                      | 19.1795(12)                                                                                                                                                                                                      |
| $\alpha^\circ$                      | 90.00                                                                                                                                                                                                            |
| $\beta^\circ$                       | 90.00                                                                                                                                                                                                            |
| $\gamma^\circ$                      | 90.00                                                                                                                                                                                                            |
| Volume/ $\text{\AA}^3$              | 14504.0(17)                                                                                                                                                                                                      |
| Z                                   | 8                                                                                                                                                                                                                |
| $D_c/\text{g} \cdot \text{cm}^{-3}$ | 2.102                                                                                                                                                                                                            |
| $\mu/\text{mm}^{-1}$                | 17.223                                                                                                                                                                                                           |
| $F(000)$                            | 8584.0                                                                                                                                                                                                           |
| $R_1^a$ ( $I > 2\sigma(I)$ )        | 0.0586                                                                                                                                                                                                           |
| $wR_2^b$ (all data)                 | 0.1424                                                                                                                                                                                                           |
| GOF on $F^2$                        | 1.051                                                                                                                                                                                                            |

$$^a R_1 = \sum(|F_o| - |F_c|) / \sum|F_o|; \quad ^b wR_2 = (\sum w(F_o^2 - F_c^2)^2 / \sum w(F_o^2)^2)^{1/2}$$

**Table S2.** Information of single-crystal structures containing the fragment of Pb $\cdots$ S-phenyl.

| Compound Name                                                                                                                                                         | CCDC Code | CCDC Number | Bond/Å      | Secondary Interaction/Å | Refs. |
|-----------------------------------------------------------------------------------------------------------------------------------------------------------------------|-----------|-------------|-------------|-------------------------|-------|
| compound <b>3</b>                                                                                                                                                     | ALIJAG    | 205059      | 2.709       | 3.296                   | 14    |
| C <sub>72</sub> H <sub>102</sub> Pb <sub>3</sub> S <sub>6</sub> (compound <b>8b</b> )                                                                                 | CAWZIJ    | 1121012     | 2.553-2.896 |                         | 15    |
| [(C <sub>6</sub> H <sub>5</sub> ) <sub>4</sub> As]-[Pb(SC <sub>6</sub> H <sub>5</sub> ) <sub>3</sub> ] ( <b>1</b> )                                                   | CUKRUV    |             | 2.619-2.647 |                         | 16    |
| Ph <sub>3</sub> PbSPh                                                                                                                                                 | DALCEY    |             | 2.515       |                         | 17    |
| [NPr <sup>n</sup> <sub>4</sub> ][Pb(SPh) <sub>3</sub> ] ( <b>2</b> )                                                                                                  | DELPOP    | 1138563     | 2.633-2.696 |                         | 18    |
| Pb-[SC <sub>6</sub> H <sub>4</sub> (CH <sub>2</sub> NMe <sub>2</sub> )-2][N(SiMe <sub>3</sub> ) <sub>2</sub> ] ( <b>6</b> )                                           | DONTAD    | 1006880     | 2.647       |                         | 19    |
| [Pb(C <sub>6</sub> F <sub>5</sub> S) <sub>2</sub> (C <sub>5</sub> H <sub>5</sub> N) <sub>2</sub> ] <sub>n</sub>                                                       | EREWUU    | 828434      | 2.652       | 3.614/3.618             | 20    |
| [(4-Me <sub>3</sub> NC <sub>6</sub> H <sub>4</sub> S) <sub>6</sub> Pb <sub>3</sub> ][PF <sub>6</sub> ] <sub>6</sub> ( <b>7</b> )                                      | FAKBIE    | 825269      | 2.712-2.981 |                         | 21    |
| [(4-Me <sub>3</sub> NC <sub>6</sub> H <sub>4</sub> S) <sub>3</sub> Pb][BPh <sub>4</sub> ] <sub>2</sub> ( <b>8</b> )                                                   | FAKBOK    | 825270      | 2.631-2.874 | 3.168/3.339             | 21    |
| [(4-Me <sub>3</sub> NC <sub>6</sub> H <sub>4</sub> S) <sub>2</sub> Pb(py)] <sub>2</sub> [BPh <sub>4</sub> ] <sub>4</sub> ( <b>9</b> )                                 | FAKBUQ    | 825271      | 2.607/2.669 | 3.106                   | 21    |
| [(4-Me <sub>3</sub> NC <sub>6</sub> H <sub>4</sub> S) <sub>2</sub> Pb(bipy) <sub>0.5</sub> ][BPh <sub>4</sub> ] <sub>2</sub> ( <b>10</b> )                            | FAKCAX    | 825272      | 2.596/2.646 | 3.176                   | 21    |
| ( <b>13</b> ) Pb(SAr <sup>Pri6</sup> ) <sub>2</sub>                                                                                                                   | FIFQES    | 955308      | 2.575/2.584 |                         | 22    |
| ( <b>14</b> ) Pb(SAr <sup>Pri8</sup> ) <sub>2</sub>                                                                                                                   | FIFQIW    | 955309      | 2.580/2.594 |                         | 22    |
| [(L <sup>Me</sup> )Pb <sub>2</sub> ] <sup>2+</sup>                                                                                                                    | FIMLET    | 243457      | 2.554/2.640 | 3.465/3.824             | 23    |
| [Pb{Ph <sub>2</sub> P(O)C <sub>6</sub> H <sub>4</sub> S-2} <sub>2</sub> ]·1/2CH <sub>3</sub> OH·2H <sub>2</sub> O ( <b>3</b> )                                        | FIQVIM    | 961451      | 2.647       |                         | 24    |
| compound <b>7</b>                                                                                                                                                     | GAGXES    | 243400      | 2.608       |                         | 25    |
| compound <b>8</b>                                                                                                                                                     | GAGXIW    | 243401      | 2.595-2.602 |                         | 25    |
| compound <b>9</b>                                                                                                                                                     | GAGXOC    | 243403      | 2.595/2.599 | 3.743                   | 25    |
| compound <b>10</b>                                                                                                                                                    | GAGXUI    | 243402      | 2.696-3.000 | 2.993-3.422             | 25    |
| [Pb <sub>10</sub> {S-2,6-(CH <sub>3</sub> ) <sub>2</sub> C <sub>6</sub> H <sub>3</sub> } <sub>20</sub> ] ( <b>1</b> )                                                 | GANKOW    | 246835      | 2.558-3.175 | 3.555/3.627             | 26    |
| [Pb <sub>8</sub> S{S-2,6-(CH <sub>3</sub> ) <sub>2</sub> C <sub>6</sub> H <sub>3</sub> } <sub>10</sub> -(C <sub>4</sub> H <sub>8</sub> O) <sub>4</sub> ] ( <b>2</b> ) | GANKUC    | 246836      | 2.627-3.121 | 3.506/3.536             | 26    |
| [Pb <sub>8</sub> O <sub>2</sub> {S-2,6-(CH <sub>3</sub> ) <sub>2</sub> C <sub>6</sub> H <sub>3</sub> } <sub>12</sub> ] ( <b>3</b> ).                                  | GANLAJ    | 246837      | 2.562-3.100 | 3.349-3.614             | 26    |
| [Pb <sub>14</sub> O <sub>6</sub> {S-2,6-(CH <sub>3</sub> ) <sub>2</sub> C <sub>6</sub> H <sub>3</sub> } <sub>16</sub> ] ( <b>4</b> )                                  | GANLEN    | 246838      | 2.627-3.055 | 3.228-3.701             | 26    |
| compound <b>2</b>                                                                                                                                                     | GUKYUH    | 713332      | 2.679       |                         | 27    |
| [Pb(SC <sub>6</sub> H <sub>4</sub> S)(dien)] <sub>n</sub>                                                                                                             | HAVDAL    | 879208      | 2.961/3.072 | 3.271/3.652             | 28    |
| [Pb <sub>3</sub> (SC <sub>6</sub> H <sub>4</sub> S) <sub>3</sub> (en) <sub>2</sub> ] <sub>n</sub>                                                                     | HIXCUN    | 678533      | 2.745-2.908 | 3.037-3.513             | 29    |
| [Pb <sub>2</sub> (S <sub>2</sub> C <sub>6</sub> H <sub>2</sub> S <sub>2</sub> )(en)] <sub>n</sub>                                                                     | HIXDAU    | 678534      | 2.580/2.619 | 2.948/3.03              | 29    |
| [Pb <sub>3</sub> (C <sub>6</sub> S <sub>6</sub> )] <sub>n</sub>                                                                                                       | HIXDEY    | 678535      | 3.073       |                         | 29    |
| PbBDT                                                                                                                                                                 | IBUDOC    | 2084844     | 2.761-2.931 |                         | 30    |
| Pb(SR <sub>f</sub> ) <sub>2</sub> ·THF <b>2a</b>                                                                                                                      | KOYFEJ    |             | 2.639       |                         | 31    |
| [PbL <sup>4</sup> (ClO <sub>4</sub> ) <sub>2</sub> ]                                                                                                                  | LEHNOB    | 1204986     | 3.141/3.175 |                         | 32    |
| [(2,6-Me <sub>2</sub> C <sub>6</sub> H <sub>3</sub> S) <sub>2</sub> Pb] <sub>2</sub> (dppe) ( <b>11</b> )                                                             | LEZKIM    | 827119      | 2.608/2.617 |                         | 33    |
| [(2,6-Me <sub>2</sub> C <sub>6</sub> H <sub>3</sub> S) <sub>2</sub> Pb] <sub>3</sub> (dmpe) ( <b>10</b> )                                                             | LEZKOS    | 827118      | 2.643-2.987 |                         | 33    |
| [(2,6-Me <sub>2</sub> C <sub>6</sub> H <sub>3</sub> S) <sub>2</sub> Pb] <sub>2</sub> (tmeda) ( <b>9</b> )                                                             | LEZKUY    | 827117      | 2.558-3.028 |                         | 33    |
| [Pb{2-(Ph <sub>2</sub> PO)-6-(Me <sub>3</sub> Si)C <sub>6</sub> H <sub>3</sub> S} <sub>2</sub> ] <b>3</b>                                                             | MAWNIH    |             | 2.644/2.646 |                         | 34    |
| [Pb{2-(Ph <sub>2</sub> P(O)CH <sub>2</sub> )C <sub>6</sub> H <sub>4</sub> S} <sub>2</sub> ] <b>4</b>                                                                  | MAWNON    | 142548      | 2.584/2.617 |                         | 34    |
| [Pb{2-(Ph <sub>2</sub> P(S)CH <sub>2</sub> )C <sub>6</sub> H <sub>4</sub> S} <sub>2</sub> ] <b>5</b>                                                                  | MAWNUT    | 142549      | 2.550-3.151 |                         | 34    |



|                                                                                                                       |          |         |             |             |    |
|-----------------------------------------------------------------------------------------------------------------------|----------|---------|-------------|-------------|----|
| [Pb{2,6-(Ph <sub>2</sub> P(S)CH <sub>2</sub> ) <sub>2</sub> C <sub>6</sub> H <sub>3</sub> S} <sub>2</sub> }] <b>6</b> | MAWPAB   | 142550  | 2.659-3.020 | 3.370/3.386 | 34 |
| compound <b>10</b>                                                                                                    | MIMQOQ   | 929509  | 2.598/2.613 |             | 35 |
| compound <b>9</b>                                                                                                     | MIMQUW   | 929508  | 2.634/2.628 |             | 35 |
| [Et <sub>4</sub> N][(MeC <sub>6</sub> H <sub>3</sub> S <sub>2</sub> )PbPh <sub>2</sub> Cl] ( <b>3</b> )               | NETDAR   | 1218793 | 2.515/2.632 |             | 36 |
| Tbt(TbtS)Pb ( <b>2</b> )                                                                                              | NOMRIQ   |         | 2.498       |             | 37 |
| [(Cp'(CO) <sub>2</sub> Mn)Pb(SMes) <sub>3</sub> ] <sup>-</sup> ( <b>A4</b> )                                          | POLREN   | 1236512 | 2.594-2.613 |             | 38 |
| compound <b>6</b>                                                                                                     | QOHKAZ   | 1243525 | 2.574       |             | 39 |
| [{O(C <sub>6</sub> H <sub>4</sub> S) <sub>2</sub> }PbPh <sub>2</sub> ] ( <b>1b</b> )                                  | QORWOK   | 704628  | 2.531/2.536 |             | 40 |
| [{S(C <sub>6</sub> H <sub>4</sub> S) <sub>2</sub> }PbPh <sub>2</sub> ] ( <b>2b</b> )                                  | QORWUQ   | 704629  | 2.531/2.521 | 3.280/3.782 | 40 |
| [{S(C <sub>6</sub> H <sub>3</sub> S) <sub>2</sub> O}PbPh <sub>2</sub> ] ( <b>3b</b> )                                 | QORXAX   | 704630  | 2.519/2.522 |             | 40 |
| [{(PPh <sub>3</sub> ) <sub>3</sub> Cu <sub>5</sub> (μ-SPh)-Pb] ( <b>1</b> )                                           | QUTYAH   | 936688  | 2.633-2.741 |             | 41 |
| [Pb(μ-SPh) <sub>4</sub> {Cu(PPh <sub>3</sub> ) <sub>2</sub> } <sub>2</sub> ] ( <b>2</b> )                             | QUTYEL   | 936689  | 2.685-2.951 |             | 41 |
| [Pb <sub>2</sub> (μ-SPh) <sub>6</sub> {Ag(PPh <sub>3</sub> ) <sub>2</sub> } <sub>2</sub> ] ( <b>3</b> )               | QUVFOE   | 1051585 | 2.606-2.722 |             | 41 |
| Pb(SC <sub>6</sub> H <sub>5</sub> ) <sub>2</sub> ( <b>1</b> )                                                         | RAVZET   |         | 2.671-2.837 | 3.373/3.519 | 42 |
| β-Pb(SPh) <sub>2</sub>                                                                                                | RAVZET01 | 670193  | 2.648-2.861 | 3.474/3.704 | 43 |
| α-Pb(SPh) <sub>2</sub>                                                                                                | RAVZET02 | 684203  | 2.556-2.805 | 3.444/3.448 | 43 |
| [Pb(Tab) <sub>3</sub> ](ClO <sub>4</sub> ) <sub>n</sub> ( <b>1</b> )                                                  | RIPROY   | 650340  | 2.683-2.763 | 3.424/3.503 | 44 |
| [(μ-Cl)Pb <sub>2</sub> (stol)(μ-stol) <sub>2</sub> ] <sub>n</sub> ( <b>1</b> )                                        | UTERUI   | 1451294 | 2.717-2.961 | 3.348/3.375 | 45 |
| [PbAg <sub>2</sub> (μ-stol) <sub>2</sub> (μ <sub>4</sub> -stol) <sub>2</sub> ] <sub>n</sub> ( <b>2</b> )              | UTESAP   | 1451295 | 2.722/3.106 |             | 45 |
| HTT-Pb                                                                                                                | VATNIQ   | 1506170 | 2.666/2.714 | 3.258-3.666 | 46 |
| Pb(SAr <sup>Pri4</sup> ) <sub>2</sub> ( <b>2</b> )                                                                    | VEYJOA   | 911152  | 2.566       |             | 47 |
| LiPb(SAr <sup>Me6</sup> ) <sub>3</sub> ( <b>4</b> )                                                                   | VEYKAN   | 911151  | 2.669-2.678 |             | 47 |
| {Pb(Br)(μ-SAr <sup>Me6</sup> ) <sub>2</sub> } <sub>2</sub> ( <b>3</b> )                                               | VEYKOB   | 911149  | 2.724-2.810 |             | 47 |
| [Pb(SC <sub>6</sub> F <sub>5</sub> ) <sub>2</sub> ] <sub>n</sub>                                                      | WEJMEE   | 610788  | 2.704-3.036 |             | 48 |
| [PbL <sup>1</sup> (MeOH)(H <sub>2</sub> O)][ClO <sub>4</sub> ] <sub>2</sub> <b>1a</b>                                 | WEWZON   |         | 3.146/3.192 |             | 49 |
| Pb <sub>5</sub> O(SR <sub>F</sub> ) <sub>8</sub> ·2C <sub>7</sub> H <sub>8</sub> ( <b>3</b> )                         | WOTFAM   | 155933  | 2.854-3.180 | 3.625/3.633 | 50 |
| Pb <sub>2</sub> I(S-C <sub>6</sub> H <sub>5</sub> ) <sub>3</sub>                                                      | WUDTOH   | 1945769 | 2.730-3.164 |             | 51 |
| Pb <sub>2</sub> Br(S-C <sub>6</sub> H <sub>5</sub> ) <sub>3</sub>                                                     | WUDWAW   | 1945770 | 2.732-3.116 |             | 51 |
| Pb <sub>2</sub> Cl(S-C <sub>6</sub> H <sub>5</sub> ) <sub>3</sub>                                                     | WUDWEA   | 1945771 | 2.723-3.098 |             | 51 |
| [(2,6-Me <sub>2</sub> C <sub>6</sub> H <sub>3</sub> S) <sub>2</sub> Pb(pyCOH)] <sub>2</sub> ( <b>3</b> )              | XIRBUW   | 643476  | 2.626/2.664 | 3.174       | 52 |
| [(2,6-Me <sub>2</sub> C <sub>6</sub> H <sub>3</sub> S) <sub>2</sub> Pb(pyOMe)] <sub>2</sub> ( <b>4</b> )              | XIRCAD   | 643477  | 2.618/2.648 | 3.267       | 52 |
| (2,6-Me <sub>2</sub> C <sub>6</sub> H <sub>3</sub> S) <sub>2</sub> Pb(pyNMe <sub>2</sub> ) ( <b>5</b> )               | XIRCEH   | 643478  | 2.607/2.621 |             | 52 |
| {[Pb(Tab) <sub>2</sub> (bpe)] <sub>2</sub> (PF <sub>6</sub> ) <sub>4</sub> ] <sub>n</sub> ·3nMeCN                     | YOTJOI   | 1031160 | 2.630/2.673 | 3.379       | 53 |

**Table S3.** Previously reported sensing materials towards NO<sub>2</sub> without light irradiation and with a response time less than one minute.

| Materials                                               | Conc./ppm | Temp./°C       | Response/%         | LOD/ppb             | T <sub>res</sub> /T <sub>rec</sub> /min | Refs.            |
|---------------------------------------------------------|-----------|----------------|--------------------|---------------------|-----------------------------------------|------------------|
| <i>Pb-HTT</i>                                           | 10        | RT             | 1005 <sup>b</sup>  | 0.0206 <sup>d</sup> | 0.04/0.40                               | <i>This work</i> |
| <i>Pb-HTT</i>                                           | 0.005     | RT             | 39.64 <sup>b</sup> | /                   | 0.44/0.77                               | <i>This work</i> |
| ZIF-8 derived-<br>ZnFe <sub>2</sub> O <sub>4</sub> -rGO | 2         | RT             | 112.3 <sup>b</sup> | 0.149 <sup>c</sup>  | 0.27 / 4.07                             | 54               |
| PbBDT OIHSL<br>nanosheets                               | 0.4       | RT             | /                  | 0.51 <sup>c</sup>   | 0.27/0.79                               | 55               |
| few-layered<br>MoS <sub>2</sub> nanosheets              | 0.5       | RT             | 530 <sup>a</sup>   | 27 <sup>c</sup>     | 0.90/20.67                              | 56               |
| Cu <sub>2</sub> O/rGO                                   | 1         | RT             | 520 <sup>a</sup>   | 32 <sup>c</sup>     | 0.49/0.76                               | 57               |
| PbS nanowires                                           | 50        | RT             | 1750 <sup>a</sup>  | 36 <sup>c</sup>     | 0.05/2.47                               | 58               |
| Pd-SnO <sub>2</sub> /rGO                                | 100       | RT             | 792 <sup>b</sup>   | 37.8 <sup>c</sup>   | 0.95/0.37                               | 59               |
| MIL-101(Cr)@PEDOT(45)                                   | 0.2       | RT             | 0.9 <sup>a</sup>   | 60 <sup>c</sup>     | <0.5 / Non                              | 60               |
| PbS CQDs                                                | 50        | RT             | 2170 <sup>a</sup>  | 84 <sup>c</sup>     | 0.2/0.62                                | 61               |
| ZIF-8/Au NW                                             | 20        | RT             | 0.9 <sup>b</sup>   | 190 <sup>c</sup>    | 0.12 / 11.5                             | 62               |
| PbCdSe QD gels                                          | 1.32      | RT             | 75 <sup>b</sup>    | 3 <sup>d</sup>      | 0.52/1.05                               | 63               |
| ZnCo-ZIF/GN-120                                         | 100       | RT             | 5461 <sup>a</sup>  | 10 <sup>d</sup>     | 0.02 / 0.2                              | 64               |
| γ-Bi <sub>2</sub> MoO <sub>6</sub> /GNCs                | 10        | RT (25%<br>RH) | 5086 <sup>a</sup>  | 10 <sup>d</sup>     | 0.06 / 0.93                             | 65               |
| MoS <sub>2</sub> /ZnO                                   | 5         | RT             | 3050 <sup>b</sup>  | 50 <sup>d</sup>     | 0.67 / 16.67                            | 66               |
| SnO <sub>2</sub> /rGO                                   | 1         | RT             | 380 <sup>a</sup>   | 50 <sup>d</sup>     | 0.23/3.16                               | 67               |
| CuO/rGO                                                 | 5         | RT             | 400.8 <sup>b</sup> | 50 <sup>d</sup>     | 0.11/0.91                               | 68               |
| N-doped MoS <sub>2</sub>                                | 10        | RT             | 28 <sup>b</sup>    | 125 <sup>d</sup>    | 0.37/1.82                               | 69               |
| PbS@MoS <sub>2</sub>                                    | 1         | RT             | 320 <sup>a</sup>   | 200 <sup>d</sup>    | <0.17/non                               | 70               |
| borophene                                               | 100       | RT             | 422 <sup>b</sup>   | 200 <sup>d</sup>    | 0.50/3.33                               | 71               |
| WO <sub>3</sub> /S/rGO                                  | 20        | RT             | 14950 <sup>b</sup> | 250 <sup>d</sup>    | 01/0.93                                 | 72               |
| NiO/CuO                                                 | 100       | RT             | 7716 <sup>b</sup>  | 1000 <sup>d</sup>   | 0.03/-                                  | 73               |
| CuO                                                     | 4         | RT             | 2810 <sup>a</sup>  | 1000 <sup>d</sup>   | 0.36/0.7                                | 74               |

<sup>a</sup> $R = R_d/R_g$  or  $R_g/R_a$ , <sup>b</sup> $R = (R_g - R_a)/R_a = \Delta R/R_a$ , <sup>c</sup>theoretical LOD, <sup>d</sup>experimental LOD.

## References

1. G. M. Sheldrick, *Acta Crystallogr. A*, 2008, **64**, 112-122.
2. G. M. Sheldrick, *Acta Crystallogr. C Struct. Chem.*, 2015, **71**, 3-8.
3. O. V. Dolomanov, L. J. Bourhis, R. J. Gildea, J. A. K. Howard and H. Puschmann, *J. Appl. Crystallogr.*, 2009, **42**, 339-341.
4. A. L. Spek, *Acta Crystallogr., Sect D Biol. Crystallogr.*, 2009, **65**, 148-155.
5. G. Kresse and J. Furthmüller, *Comput. Mater. Sci.*, 1996, **6**, 15-50.
6. G. Kresse and J. Furthmüller, *Phys. Rev. B Condens. Matter.*, 1996, **54**, 11169-11186.
7. J. P. Perdew, K. Burke and M. Ernzerhof, *Phys. Rev. Lett.*, 1996, **77**, 3865-3868.
8. P. E. Blochl, *Phys. Rev. B Condens. Matter.*, 1994, **50**, 17953-17979.
9. G. Kresse and D. Joubert, *Phys. Rev. B*, 1999, **59**, 1758-1775.
10. S. Grimme, J. Antony, S. Ehrlich and H. Krieg, *J. Chem. Phys.*, 2010, **132**, 154104.
11. A. J. Clough, N. M. Orchanian, J. M. Skelton, A. J. Neer, S. A. Howard, C. A. Downes, L. F. J. Piper, A. Walsh, B. C. Melot and S. C. Marinescu, *J. Am. Chem. Soc.*, 2019, **141**, 16323-16330.
12. Z. Chen, Y. Cui, Y. Jin, L. Liu, J. Yan, Y. Sun, Y. Zou, Y. Sun, W. Xu and D. Zhu, *J. Mater. Chem. C*, 2020, **8**, 8199-8205.
13. R. Dong, M. Pfeiffermann, H. Liang, Z. Zheng, X. Zhu, J. Zhang and X. Feng, *Angew. Chem., Int. Ed.*, 2015, **54**, 12058-12063.
14. K. Jurkschat, K. Peveling and M. Schürmann, *Eur. J. Inorg. Chem.*, 2003, **2003**, 3563-3571.
15. P. B. Hitchcock, M. F. Lappert, B. J. Samways and E. L. Weinberg, *J. Chem. Soc. Chem. Comm.*, 1983, 1492-1494.
16. P. A. W. Dean, J. J. Vittal and N. C. Payne, *Inorg. Chem.*, 1984, **23**, 4232-4236.
17. M. G. Begley, C. Gaffney, P. G. Harrison and A. Steel, *J. Organomet. Chem.*, 1985, **289**, 281-293.
18. G. Christou, K. Folting and J. C. Huffman, *Polyhedron*, 1984, **3**, 1247-1253.
19. A. Pop, L. Wang, V. Dorcet, T. Roisnel, J.-F. o. Carpentier, A. Silvestru and Y. Sarazin, *Dalton Trans.*, 2014, **43**, 16459-16474.
20. S. E. Appleton, G. G. Briand, A. Decken and A. S. Smith, *Acta Crystallogr. Sect. E*, 2011, **67**, m714.
21. G. G. Briand, A. Decken, M. C. Finnis, A. D. Gordon, N. E. Hughes and L. M. Scott, *Polyhedron*, 2012, **33**, 171-178.
22. B. D. Rekker, T. M. Brown, J. C. Fettinger, F. Lips, H. M. Tuononen, R. H. Herber and P. P. Power, *J. Am. Chem. Soc.*, 2013, **135**, 10134-10148.
23. V. Lozan and B. Kersting, *Eur. J. Inorg. Chem.*, 2005, **2005**, 504-512.
24. P. Fernández, J. Romero, J. A. García-Vázquez, A. Sousa-Pedrares, L. Valencia, J. Zubietta and P. Pérez-Lourido, *J. Organomet. Chem.*, 2014, **750**, 1-6.
25. S. E. Appleton, G. G. Briand, A. Decken and A. S. Smith, *Dalton Trans.*, 2004, 3515-3520.
26. A. Eichhöfer, *Eur. J. Inorg. Chem.*, 2005, **2005**, 1683-1688.
27. J. He, C. Yang, Z. Xu, M. Zeller, A. D. Hunter and J. Lin, *J. Solid State Chem.*, 2009, **182**, 1821-1826.
28. D. L. Turner, K. H. Stone, P. W. Stephens, A. Walsh, M. P. Singh and T. P. Vaid, *Inorg. Chem.*, 2012, **51**, 370-376.
29. D. L. Turner, T. P. Vaid, P. W. Stephens, K. H. Stone, A. G. Dipasquale and A. L. Rheingold, *J. Am. Chem. Soc.*, 2008, **130**, 14-15.

30. Y. Wen, G.-E. Wang, X. Jiang, X. Ye, W. Li and G. Xu, *Angew. Chem., Int. Ed.*, 2021, **60**, 19710-19714.
31. D. Labahn, S. Brooker, G. M. Sheldrick and H. W. Roesky, *Z. Anorg. Allg. Chem.*, 1992, **610**, 163-168.
32. K. R. Adam, D. S. Baldwin, A. Bashall, L. F. Lindoy, M. McPartlin and H. R. Powell, *J. Chem. Soc. Dalton Trans.*, 1994, **2**, 237-238.
33. A. J. Rossini, A. W. Macgregor, A. S. Smith, G. Schatte, R. W. Schurko and G. G. Briand, *Dalton Trans.*, 2013, **42**, 9533-9546.
34. P. Pérez-Lourido, J. Romero, J. A. García-Vázquez, A. Sousa, Y. Zheng, J. R. Dilworth and J. Zubieta, *J. Chem. Soc. Dalton Trans.*, 2000, DOI: 10.1039/A908496G, 769-774.
35. B. M. Barry, B. W. Stein, C. A. Larsen, M. N. Wirtz, W. E. Geiger, R. Waterman and R. A. Kemp, *Inorg. Chem.*, 2013, **52**, 9875-9884.
36. V. Chandrasekhar, A. Chandrasekaran, R. O. Day, J. M. Holmes and R. R. Holmes, *Phosphorus, Sulfur, and Silicon*, 1996, **115**, 125-139.
37. N. Kano, N. Tokitoh and R. Okazaki, *Organometallics*, 1997, **16**, 4237-4239.
38. F. Ettl, M. Schollenberger, B. Schiemenz, W. Imhof, G. Huttner and L. Zsolnai, *J. Organomet. Chem.*, 1994, **476**, 207-214.
39. J. H. Aupers, P. J. Cox, S. M. S. V. Doidge-Harrison, R. Alan howie, J. N. Low and J. L. Wardell, *Main Group Chem.*, 1999, **3**, 23-42.
40. S. González -Montiel, B. Flores-Chávez, J. G. Alvarado-Rodríguez, N. Andrade-López and J. A. Cogordan, *Polyhedron*, 2009, **28**, 467-472.
41. G. Gupta and S. Bhattacharya, *RSC Adv.*, 2015, **5**, 94486-94494.
42. A. D. Rae, D. C. Craig, I. G. Dance, M. L. Scudder, P. A. W. Dean, M. A. Kmetc, N. C. Payne and J. J. Vittal, *Acta Crystallogr. Sect. B*, 1997, **53**, 457-465.
43. M. Giffard, N. Mercier, B. t. Gravouille, E. Ripaud, J. m. Luc and B. Sahraoui, *CrystEngComm*, 2008, **10**, 968-971.
44. Z.-G. Ren, X.-Y. Tang, L. Li, G.-F. Liu, H.-X. Li, Y. Chen, Y. Zhang and J.-P. Lang, *Inorg. Chem. Commun.*, 2007, **10**, 1253-1256.
45. Z.-M. Wang, S.-M. Shen, X.-Y. Shen, F. Hu, A.-Q. Jia and Q.-F. Zhang, *J. Coord. Chem.*, 2016, **69**, 2263-2271.
46. J. Huang, Y. He, M.-S. Yao, J. He, G. Xu, M. Zeller and Z. Xu, *J. Mater. Chem. A*, 2017, **5**, 16139-16143.
47. B. D. Rekker, T. M. Brown, M. M. Olmstead, J. C. Fettinger and P. P. Power, *Inorg. Chem.*, 2013, **52**, 3054-3062.
48. H. Fleischer, C. Heller and D. Schollmeyer, *Acta Crystallogr. Sect. E*, 2006, **62**, m1365-m1367.
49. A. Bashall, M. McPartlin, B. P. Murphy, H. R. Powell and S. Waikar, *J. Chem. Soc. Dalton Trans.*, 1994, 1383-1390.
50. F. T. Edelmann, J.-K. F. Buijink, S. A. Brooker, R. Herbst-Irmer, U. Kilimann and F. M. Bohnen, *Inorg. Chem.*, 2000, **39**, 6134-6135.
51. A. H. Coffey, P. Yoo, D. H. Kim, Akriti, M. Zeller, S. Avetian, L. Huang, P. Liao and L. Dou, *Chem. – Eur. J.*, 2020, **26**, 6599-6607.
52. G. G. Briand, A. D. Smith, G. Schatte, A. J. Rossini and R. W. Schurko, *Inorg. Chem.*, 2007, **46**, 8625-8637.
53. F. Wang, F.-L. Li, M.-M. Xu, H. Yu, J.-G. Zhang, H.-T. Xia and J.-P. Lang, *J. Mater. Chem. A*, 2015, **3**, 5908-5916.
54. A. Bag, M. Kumar, D.-B. Moon, A. Hanif, M. J. Sultan, D. H. Yoon and N.-E. Lee, *Sens. Actuators, B* 2021, **346**, 130463.
55. Y. Wen, G. E. Wang, X. Jiang, X. Ye, W. Li and G. Xu, *Angew. Chem., Int. Ed.*, 2021, **60**, 19710-19714.

56. H. H. Hau, T. T. H. Duong, N. K. Man, T. Thi Viet Nga, C. Thi Xuan, D. Thi Thanh Le, N. Van Toan, C. M. Hung, N. Van Duy, N. Van Hieu and N. D. Hoa, *Sens. Actuators, A* 2021, **332**, 113137.
57. J. Pan, W. Liu, L. Quan, N. Han, S. Bai, R. Luo, Y. Feng, D. Li and A. Chen, *Ind. Eng. Chem. Res.*, 2018, **57**, 10086-10094.
58. H. Kan, M. Li, J. Luo, B. Zhang, J. Liu, Z. Hu, G. Zhang, S. Jiang and H. Liu, *IEEE Sensors J.*, 2019, **19**, 846-851.
59. H. Bai, H. Guo, C. Feng, J. Wang, B. Liu, Z. Xie, F. Guo, D. Chen, R. Zhang and Y. Zheng, *Appl. Surf. Sci.*, 2022, **575**, 151698.
60. B. Le Ouay, M. Boudot, T. Kitao, T. Yanagida, S. Kitagawa and T. Uemura, *J. Am. Chem. Soc.*, 2016, **138**, 10088-10091.
61. H. Liu, M. Li, O. Voznyy, L. Hu, Q. Fu, D. Zhou, Z. Xia, E. H. Sargent and J. Tang, *Adv. Mater.*, 2014, **26**, 2718-2724.
62. P. Li, H. Zhan, S. Tian, J. Wang, X. Wang, Z. Zhu, J. Dai, Y. Dai, Z. Wang, C. Zhang, X. Huang and W. Huang, *ACS Appl. Mater. Interfaces*, 2019, **11**, 13624-13631.
63. X. Geng, S. Li, L. Mawella-Vithanage, T. Ma, M. Kilani, B. Wang, L. Ma, C. C. Hewa-Rahinduwage, A. Shafikova, E. Nikolla, G. Mao, S. L. Brock, L. Zhang and L. Luo, *Nat. Commun.*, 2021, **12**, 4895.
64. L. He, W. Zhang, H. Wu and Y. Zhao, *ACS Appl. Nano Mater.*, 2021, **4**, 3998-4006.
65. L. He, H. Lv, L. Ma, W. Li, J. Si, M. Ikram, M. Ullah, H. Wu, R. Wang and K. Shi, *Carbon*, 2020, **157**, 22-32.
66. Y. Han, D. Huang, Y. Ma, G. He, J. Hu, J. Zhang, N. Hu, Y. Su, Z. Zhou, Y. Zhang and Z. Yang, *ACS Appl. Mater. Interfaces*, 2018, **10**, 22640-22649.
67. Z. Wang, T. Zhang, T. Han, T. Fei, S. Liu and G. Lu, *Sens. Actuators, B* 2018, **266**, 812-822.
68. H. Bai, H. Guo, J. Wang, Y. Dong, B. Liu, Z. Xie, F. Guo, D. Chen, R. Zhang and Y. Zheng, *Sens. Actuators, B* 2021, **337**, 129783.
69. R. Wu, J. Hao, S. Zheng, Q. Sun, T. Wang, D. Zhang, H. Zhang, Y. Wang and X. Zhou, *Appl. Surf. Sci.*, 2022, **571**, 151162.
70. J. Tan, J. Hu, J. Ren, J. Peng, C. Liu, Y. Song and Y. Zhang, *Chin. Chem. Lett.*, 2020, **31**, 2103-2108.
71. C. Hou, G. Tai, Y. Liu and X. Liu, *Nano Res.*, 2022, **15**, 2537-2544.
72. T. Wang, J. Hao, S. Zheng, Q. Sun, D. Zhang and Y. Wang, *Nano Res.*, 2018, **11**, 791-803.
73. H. Xu, J. Zhang, A. U. Rehman, L. Gong, K. Kan, L. Li and K. Shi, *Appl. Surf. Sci.*, 2017, **412**, 230-237.
74. S. Li, M. Wang, C. Li, J. Liu, M. Xu, J. Liu and J. Zhang, *Sci. China Mater.*, 2018, **61**, 1085-1094.
